# Supplementary material for: Influence of Frailty on Outcome in Older Patients Undergoing Non-Cardiac Surgery - A Systematic Review and Meta-Analysis
Source: PubMed Central journal article supplement (PMC7505262; doi:10.14336/ad.2019.1024), 2020-10-01
Supplement: AD-11-5-1276-suppl.pdf [file AD-11-5-1276-suppl.pdf]

## SUPPLEMENTARY DATA

# **Influence of Frailty on Outcome in Older Patients Undergoing Non-Cardiac Surgery – A Systematic Review and Meta-Analysis**

**Elke K.M. Tjeertes<sup>1</sup>, Joris M.K. van Fessem<sup>1</sup>, Francesco U.S. Mattace-Raso<sup>2</sup>, Anton G.M. Hoofwijk<sup>3</sup>, Robert Jan Stolker<sup>1</sup>, Sanne E. Hoeks<sup>1\*</sup>**

<sup>1</sup>Department of Anesthesiology, Erasmus MC University Medical Center, Rotterdam, the Netherlands

<sup>2</sup>Department of Internal Medicine, Division of Geriatric Medicine, Erasmus MC University Medical Center, Rotterdam, the Netherlands

<sup>3</sup>Department of Surgery, Zuyderland Medical Center, Geleen, the Netherlands

# SUPPLEMENTARY DATA

**Supplementary Table 1.** Frailty assessment tools in detail.

| Instrument                                                                                                                                 | Description                                                                                                                                                                                                                                                                                                                                                                      | Items | Range | Suggested Cut-off                                                                                                              | Studies             |
|--------------------------------------------------------------------------------------------------------------------------------------------|----------------------------------------------------------------------------------------------------------------------------------------------------------------------------------------------------------------------------------------------------------------------------------------------------------------------------------------------------------------------------------|-------|-------|--------------------------------------------------------------------------------------------------------------------------------|---------------------|
| <b>Frailty Index (FI) / Canadian Study of Health and aging frailty index (CSHA-FI) / Frailty index of accumulated deficits (FI-CD)[23]</b> | Index of accumulated health deficits in the physical, cognitive, functional and social realms (symptoms, signs, disabilities, laboratory, radiographic) out of a list of 70 deficits                                                                                                                                                                                             | 70    | 0-1   | Not frail $\leq 0.25$<br>Frail $> 0.25$                                                                                        | [44, 45]            |
| <b>Groningen Frailty Index/indicator (GFI) [46]</b>                                                                                        | (Self-reporting) questionnaire in 4 domains: physical, cognitive, social and psychological                                                                                                                                                                                                                                                                                       | 15    | 0-15  | Not frail $< 4$<br>Frail $\geq 4$                                                                                              | [47-52]             |
| <b>Hopkins Frailty Score / Fried Frailty criteria / (Fried's) Frailty phenotype (FP) [25]</b>                                              | Defining phenotype of frailty by identifying criteria: unintentional weight loss, exhaustion, low energy expenditure, low grip strength, and slowed waking speed                                                                                                                                                                                                                 | 5     | 0-5   | Not frail: 0 (-1)<br>Pre-frail: (1-) 2<br>Frail $\geq 3$                                                                       | [53-63]             |
| <b>Modified Frailty Index (mFI) [22]</b>                                                                                                   | Modification of the CSHA-FI, 11 variables: diabetes mellitus, functional status index of $\geq 2$ , COPD or pneumonia, congestive heart failure, myocardial infarction, percutaneous coronary intervention and/or stenting or angina, hypertension requiring medication, peripheral vascular disease or ischemic rest pain, impaired sensorium, TIA or CVA, and CVA with deficit | 11    | 0-1   | Not frail: 0<br>Intermediate frail: 0.09-0.18<br>Frail $\geq 0.27$                                                             | [33, 35, 36, 64-84] |
| <b>(Reported) Edmonton Frail Scale ((R)EFS) [85]</b>                                                                                       | Questionnaire/test on 9 domains (mood, functional independence, medication use, social support, nutrition, general health status, continence); two performance-based test: Clock test for cognitive impairment and 'Timed Get Up and Go' for functional performance                                                                                                              | 11    | 0-17  | Not frail: 0-5<br>Vulnerable: 6-7<br>Frail, mildly: 8-9<br>Frail, moderately: 10-11<br>Frail, severely: 12-17                  | [53, 86, 87]        |
| <b>Rockwood 7-point Cical Frailty Scale [88]</b>                                                                                           | 7- point clinical frailty score derived from the Canadian Study of Health and Ageing (CSHA)                                                                                                                                                                                                                                                                                      | 7     | 0-7   | fit 1; Well 2; Well, treated comorbid disease 3; Apparently vulnerable 4; Mildly frail 5; Moderately frail 6; Severely frail 7 | [52, 89-91]         |
| <b>VES-13; Vulnerable Elderly Survey [92]</b>                                                                                              | Self-administrated questionnaire concerning perception of health status, example of everyday activity, difficulty performing activities related to health or physical condition                                                                                                                                                                                                  | 13    | 0-15  | Not frail $< 3$<br>Frail $\geq 3$                                                                                              | [48, 51, 52, 93]    |
| <b>John Hopkins' Adjusted Clinical Groups (ACG) case-mix system / ACG frailty</b>                                                          | Measure of frailty developed to be used specifically on administrative data Assesses frailty by the presence of 11 conditions (e.g., difficulty walking, weight loss, frequent falls,                                                                                                                                                                                            | 12    | 0-12  | Not frail 0<br>Frail $\geq 1$                                                                                                  | [95-97]             |

# SUPPLEMENTARY DATA

|                                                                        |                                                                                                                        |     |         |                              |                |
|------------------------------------------------------------------------|------------------------------------------------------------------------------------------------------------------------|-----|---------|------------------------------|----------------|
| <b>diagnoses indicator/Johns Hopkins ACG frailty Indicator [94]</b>    | malnutrition, impaired vision, decubitus ulcer, incontinence and 4 unnamed criteria.)                                  |     |         |                              |                |
| <b>Frailty-based bedside risk analysis index (RAI) [98]</b>            | Assessment scoring sex, age, cancer, co-morbidities, residence, cognition, ADL                                         | 11  | 0-75    | Not frail < 10<br>Frail ≥ 10 | [99]           |
| <b>Comprehensive geriatric assessment / CGA / Balducci-score [100]</b> | A multidimensional process that identifies medical, psychosocial, and functional limitations of a frail elderly person | 4-6 | 0-4/(6) | Not frail 0<br>Frail ≥ 1     | [52, 101, 102] |
| <b>Multidimensional Frailty Score [103]</b>                            | Scoring index based on results of the CGA, patient characteristics and laboratory variables                            | 9   | 0-15    | Not frail ≤ 5<br>Frail > 5   | [103]          |

## Supplementary information. Full literature search.

### Embase.com

('frail elderly'/de OR ((frail\* NEAR/6 (elderl\* OR centenarian\* OR nonagenarian\* OR octogenarian\* OR septagenarian\* OR '65 year\*' OR aging OR ageing OR aged OR senior\* OR geriatric\* OR old OR older))):ab,ti OR ((frail\*):ab,ti AND (aged/exp OR aging/de OR 'geriatrics'/de OR 'geriatric care'/de OR 'geriatric assessment'/de))) AND ('abdominal surgery'/exp OR 'breast surgery'/exp OR 'cancer surgery'/exp OR 'ear nose throat surgery'/exp OR 'endocrine surgery'/exp OR 'eye surgery'/exp OR 'head and neck surgery'/exp OR 'major surgery'/exp OR 'neurosurgery'/exp OR 'orthopedic surgery'/exp OR 'plastic surgery'/exp OR 'esophagus surgery'/exp OR 'lung surgery'/exp OR 'transplantation'/de OR 'organ transplantation'/de OR 'kidney transplantation'/de OR 'liver transplantation'/de OR 'lung transplantation'/de OR 'urologic surgery'/exp OR 'vascular surgery'/de OR 'aneurysm surgery'/exp OR 'aorta surgery'/de OR 'artery surgery'/de OR 'carotid artery surgery'/exp OR 'endarterectomy'/exp OR ('artery surgery'/exp NOT 'coronary artery surgery'/exp) OR 'carotid angioplasty'/exp OR 'carotid artery stenting'/exp OR 'blood vessel shunt'/de OR 'leg revascularization'/exp OR 'embolectomy'/exp OR 'endovascular surgery'/exp OR 'limb salvage'/exp OR 'microvascular surgery'/exp OR 'vein surgery'/exp OR (((('non cardiac' OR noncardiac OR abdominal\* OR breast\* OR cancer\* OR ear\* OR nose\* OR throat\* OR endocrine\* OR eye\* OR head\* OR neck\* OR orthopedic\* OR plastic\* OR urologic\* OR esophag\* OR oesophag\* OR lung\* OR pulmonar\* OR gastrointestin\* OR intestin\* OR gastric OR vascul\* OR joint\* OR renal OR kidney OR hepatic OR liver OR pancrea\* OR urologic\* OR aneurysm\* OR aort\* OR carotid\* OR colorect\* OR orthognat\* OR breast\* OR neoplasm\* OR otorhinolar\* OR endocrin\* OR ophtalmol\* OR orthoped\* OR plastic\* OR urolog\*) NEAR/3 (surg\* OR operat\* OR perioperat\*)) OR neurosurg\* OR 'general surgery' OR ((organ\* OR kidney\* OR liver\* OR hepatic\* OR renal OR pulmonar\*) NEAR/3 transplantat\*)):ab,ti)

### Medline Ovid

('Frail Elderly'/ OR ((frail\* ADJ6 (elderl\* OR centenarian\* OR nonagenarian\* OR octogenarian\* OR septagenarian\* OR "65 year\*" OR aging OR ageing OR aged OR senior\* OR geriatric\* OR old OR older))):ab,ti. OR ((frail\*):ab,ti. AND (exp aged/ OR exp aging/ OR "Geriatrics"/ OR "Geriatric Assessment"/))) AND (Surgical Procedures, Operative/ OR Specialties, Surgical/ OR Colorectal Surgery/ OR General Surgery/ OR Orthognathic Surgery/ OR breast/su OR exp neoplasms/su OR exp Otorhinolaryngologic Diseases/su OR Endocrine Surgical Procedures/ OR exp Ophthalmologic Surgical Procedures/ OR exp neurosurgery/ OR exp Neurosurgical Procedures/ OR Orthopedics/su OR Surgery, Plastic/ OR exp Pulmonary Surgical Procedures/ OR transplantation/ OR organ transplantation/ OR kidney transplantation/ OR liver transplantation/ OR lung transplantation/ OR exp Urologic Surgical Procedures/ OR Vascular Surgical Procedures/ OR Endarterectomy/ OR embolectomy/ OR limb salvage/ OR Microvascular Decompression Surgery/ OR Neurosurgical Procedures/ OR (((non cardiac OR noncardiac OR abdominal\* OR breast\* OR cancer\* OR ear\* OR nose\* OR throat\* OR endocrine\* OR eye\* OR head\* OR neck\* OR orthopedic\* OR plastic\* OR thora\* OR urologic\* OR esophag\* OR oesophag\* OR lung\* OR pulmonar\* OR gastrointestin\* OR intestin\* OR gastric OR vascul\* OR joint\* OR renal OR kidney OR hepatic OR liver OR pancrea\* OR urologic\* OR aneurysm\* OR aort\* OR carotid\* OR colorect\* OR general\* OR orthognat\* OR breast\* OR neoplasm\* OR otorhinolar\* OR endocrin\* OR ophtalmol\* OR orthoped\* OR plastic\* OR urolog\*) ADJ3 (surg\* OR operat\* OR perioperat\*)) OR neurosurg\* OR ((organ\* OR kidney\* OR liver\* OR hepatic\* OR renal OR pulmonar\*) ADJ3 transplantat\*)):ab,ti.)

### Cochrane

# SUPPLEMENTARY DATA

((frail\* NEAR/6 (elderl\* OR centenarian\* OR nonagenarian\* OR octogenarian\* OR septagenarian\* OR '65 year\*' OR aging OR ageing OR aged OR senior\* OR geriatric\* OR old OR older));ab,ti ) AND (((('non cardiac' OR noncardiac OR abdominal\* OR breast\* OR cancer\* OR ear\* OR nose\* OR throat\* OR endocrine\* OR eye\* OR head\* OR neck\* OR orthopedic\* OR plastic\* OR urologic\* OR esophag\* OR oesophag\* OR lung\* OR pulmonar\* OR gastrointestin\* OR intestin\* OR gastric OR vascul\* OR joint\* OR renal OR kidney OR hepatic OR liver OR pancrea\* OR urologic\* OR aneurysm\* OR aort\* OR carotid\* OR colorect\* OR orthognat\* OR breast\* OR neoplasm\* OR otorhinolar\* OR endocrin\* OR ophtalmol\* OR orthoped\* OR plastic\* OR urolog\*) NEAR/3 (surg\* OR operat\* OR perioperat\*)) OR neurosurg\* OR 'general surgery' OR ((organ\* OR kidney\* OR liver\* OR hepatic\* OR renal Or pulmonar\*) NEAR/3 transplantat\*)):ab,ti)

## Web of science

TS=(((frail\* NEAR/5 (elderl\* OR centenarian\* OR nonagenarian\* OR octogenarian\* OR septagenarian\* OR "65 year\*" OR aging OR ageing OR aged OR senior\* OR geriatric\* OR old OR older))) AND (((("non cardiac" OR noncardiac OR abdominal\* OR breast\* OR cancer\* OR ear\* OR nose\* OR throat\* OR endocrine\* OR eye\* OR head\* OR neck\* OR orthopedic\* OR plastic\* OR urologic\* OR esophag\* OR oesophag\* OR lung\* OR pulmonar\* OR gastrointestin\* OR intestin\* OR gastric OR vascul\* OR joint\* OR renal OR kidney OR hepatic OR liver OR pancrea\* OR urologic\* OR aneurysm\* OR aort\* OR carotid\* OR colorect\* OR orthognat\* OR breast\* OR neoplasm\* OR otorhinolar\* OR endocrin\* OR ophtalmol\* OR orthoped\* OR plastic\* OR urolog\*) NEAR/2 (surg\* OR operat\* OR perioperat\*)) OR neurosurg\* OR "general surgery" OR ((organ\* OR kidney\* OR liver\* OR hepatic\* OR renal Or pulmonar\*) NEAR/2 transplantat\*))) )

## PubMed publisher

("Frail Elderly"[mh] OR ((frail\*[tiab] AND (elderl\*[tiab] OR centenarian\*[tiab] OR nonagenarian\*[tiab] OR octogenarian\*[tiab] OR septagenarian\*[tiab] OR 65 year\*[tiab] OR aging OR ageing OR aged OR senior\*[tiab] OR geriatric\*[tiab] OR old OR older))) OR ((frail\*[tiab] AND (aged[mh] OR aging[mh] OR "Geriatrics"[mh] OR "Geriatric Assessment"[mh]))) AND (Surgical Procedures, Operative[mh] OR Specialties, Surgical[mh] OR Colorectal Surgery[mh] OR General Surgery[mh] OR Orthognathic Surgery[mh] OR breast/su[mh] OR neoplasms/su[mh] OR Otorhinolaryngologic Diseases/su[mh] OR Endocrine Surgical Procedures[mh] OR Ophthalmologic Surgical Procedures[mh] OR neurosurgery[mh] OR Neurosurgical Procedures[mh] OR Orthopedics/su[mh] OR Surgery, Plastic[mh] OR Pulmonary Surgical Procedures[mh] OR transplantation[mh] OR organ transplantation[mh] OR kidney transplantation[mh] OR liver transplantation[mh] OR lung transplantation[mh] OR Urologic Surgical Procedures[mh] OR Vascular Surgical Procedures[mh] OR Enderterectomy[mh] OR embolectomy[mh] OR limb salvage[mh] OR Microvascular Decompression Surgery[mh] OR Neurosurgical Procedures[mh] OR (((non cardiac OR noncardiac OR abdominal\*[tiab] OR breast\*[tiab] OR cancer\*[tiab] OR ear[tiab] OR ears[tiab] OR nose\*[tiab] OR throat\*[tiab] OR endocrine\*[tiab] OR eye\*[tiab] OR head\*[tiab] OR neck\*[tiab] OR orthopedic\*[tiab] OR plastic\*[tiab] OR thoracic[tiab] OR thorax[tiab] OR urologic\*[tiab] OR esophag\*[tiab] OR oesophag\*[tiab] OR lung\*[tiab] OR pulmonar\*[tiab] OR gastrointestin\*[tiab] OR intestin\*[tiab] OR gastric OR vascul\*[tiab] OR joint\*[tiab] OR renal OR kidney OR hepatic OR liver OR pancreas\*[tiab] OR pancrea\*[tiab] OR urologic\*[tiab] OR aneurysm\*[tiab] OR aort\*[tiab] OR carotid\*[tiab] OR colorect\*[tiab] OR general\*[tiab] OR orthognat\*[tiab] OR breast\*[tiab] OR neoplasm\*[tiab] OR otorhinolar\*[tiab] OR endocrin\*[tiab] OR ophtalmol\*[tiab] OR orthoped\*[tiab] OR plastic\*[tiab] OR urolog\*[tiab]) AND (surg\*[tiab] OR operation[tiab] OR operative[tiab] OR perioperat\*[tiab])) OR neurosurg\*[tiab] OR ((organ[tiab] OR organs[tiab] OR kidney\*[tiab] OR liver\*[tiab] OR hepatic\*[tiab] OR renal Or pulmonar\*[tiab]) AND transplantat\*[tiab]))) AND publisher[sb]

## Google scholar

200 first results: Frail|frailty elderly|older|seniors "non cardiac surgery"|noncardiac surgery"  
All results: allintitle:Frail|frailty elderly|older|seniors surgery|operative -cardiac

**Supplementary Table 2.** Quality assessment of included studies.

| Study      | Study participation | Study attrition | Prognostic factor measurement | Outcome measurement | Confounding measurement and account | Analysis | Overall rating |
|------------|---------------------|-----------------|-------------------------------|---------------------|-------------------------------------|----------|----------------|
| Abt        | +                   | +               | +                             | +                   | ±                                   | +        | 11             |
| Adams      | +                   | +               | +                             | +                   | ±                                   | +        | 11             |
| Arya       | +                   | +               | +                             | +                   | +                                   | +        | 12             |
| Augustin   | +                   | +               | +                             | +                   | +                                   | +        | 12             |
| Brahmbhatt | +                   | +               | +                             | +                   | +                                   | +        | 12             |
| Bras       | ±                   | ±               | +                             | +                   | ?                                   | ±        | 8              |

## SUPPLEMENTARY DATA

|                 |   |   |   |   |   |   |    |
|-----------------|---|---|---|---|---|---|----|
| Chappidi        | + | + | + | + | + | + | 12 |
| Chimukangara    | ± | + | + | + | ± | ± | 9  |
| Cloney          | + | ± | + | + | - | ± | 8  |
| Cooper          | + | + | + | ± | - | ± | 8  |
| Courtney-Brooks | ± | + | + | + | - | ± | 8  |
| Dale            | ± | + | ± | + | ± | ± | 8  |
| Dasgupta        | ± | ± | + | + | + | + | 10 |
| Farhat          | + | + | ± | + | ? | + | 9  |
| Flexman         | + | + | + | + | + | ± | 11 |
| Hewitt          | ± | + | + | + | ± | ± | 9  |
| Huisman         | + | ± | + | + | + | + | 11 |
| Joseph          | ± | ± | + | + | ± | + | 9  |
| Kenig           | ± | ± | + | ± | + | + | 9  |
| Kim (2016)      | + | + | + | ± | + | + | 11 |
| Kim (2014)      | + | ± | + | + | + | + | 11 |
| Krishnan        | ± | ± | ± | ± | - | ± | 6  |
| Kristjansson    | + | + | + | + | + | ± | 11 |
| Kua             | ± | ? | + | + | ± | + | 8  |
| Lascano         | + | + | + | + | + | + | 12 |
| Lasithiotakis   | ± | ? | ± | + | - | ± | 5  |
| Leung           | - | ± | + | ± | + | + | 8  |
| Levy            | + | + | + | + | + | + | 12 |
| Li              | + | ± | ± | + | + | ± | 9  |
| Louwers         | + | + | + | + | ± | + | 11 |
| Makary          | + | + | + | + | ± | + | 11 |
| McAdams-DeMarco | ± | + | + | + | + | ± | 10 |
| McIsaac (JAMA)  | + | + | + | + | + | + | 12 |
| McIsaac         | + | + | + | + | + | + | 12 |
| Melin           | + | + | + | + | - | - | 8  |
| Mogal           | + | + | + | + | + | + | 12 |
| Mosquera        | + | + | ± | + | ? | + | 9  |
| Neuman          | + | ± | ± | + | ± | + | 9  |
| Obeid           | + | + | + | + | ± | ± | 10 |
| Partridge       | ± | ± | + | + | ± | + | 9  |
| Pearl           | + | + | + | + | ± | + | 11 |
| Phan            | + | + | + | + | + | + | 12 |
| Reisinger       | + | + | + | + | ± | + | 11 |
| Revenig (2015)  | + | + | + | + | ± | ± | 10 |
| Revenig (2014)  | ± | + | + | + | ± | + | 10 |
| Revenig (2013)  | ± | + | + | + | + | + | 11 |

## SUPPLEMENTARY DATA

|                          |   |   |   |   |   |   |    |
|--------------------------|---|---|---|---|---|---|----|
| <b>Robinson</b>          | + | + | ± | + | - | ± | 8  |
| <b>Shin (2017)</b>       | + | + | + | + | + | + | 12 |
| <b>Shin (2016)</b>       | + | + | + | + | + | + | 12 |
| <b>Suskind</b>           | + | + | + | + | + | + | 12 |
| <b>Suskind (Urology)</b> | + | + | + | + | + | + | 12 |
| <b>Tan</b>               | ± | + | + | + | ± | + | 10 |
| <b>Tegels</b>            | ± | ± | + | + | ± | + | 9  |
| <b>Tsiouris</b>          | + | + | + | + | ± | + | 11 |
| <b>Ugolini</b>           | ± | ± | + | + | ± | - | 7  |
| <b>Uppal</b>             | + | + | + | + | + | + | 12 |

Study participation: The study correctly defines and describes the study population

Study attrition: The study was able to obtain a complete follow up

Prognostic factor management: The study provides a clear description of the prognostic factor measured

Outcome measurement: The study provides a clear definition of outcome

Confounding measurement and account: Adequately valid and reliable measurement of potential confounders

Analysis: The statistical analysis is appropriate for the design of the study

Description of used symbols:

+ Yes; adequate and complete description

± Partly; incomplete description

? Unsure; doubtful description

- No; not described
